# Supplementary material for: Dimer Rhenium Tetrafluoride with a Triple Bond Re-Re: Structure, Bond Strength
Source: MDPI journal article supplement (doi:10.3390/molecules28093665), 2023-04-23
Supplement: s1 [file s1]

## SUPPLEMENTARY MATERIALS

### Dimer Rhenium Tetrafluoride with a Triple Bond Re-Re: Structure, Bond Strength

Nina I. Giricheva <sup>1</sup>, Natalia V. Tverdova <sup>2</sup>, Valery V. Sliznev <sup>2</sup> and Georgiy V. Girichev <sup>2,\*</sup>

<sup>1</sup> Nanomaterial Research Institute, Ivanovo State University, Ermak Str. 39, 153025 Ivanovo, Russia; n.i.giricheva@mail.ru

<sup>2</sup> Department of Physics, Ivanovo State University of Chemistry and Technology, Sheremetevsky Ave. 7, 153000 Ivanovo, Russia; tverdova@isuct.ru (N.V.T.); sliznev@mail.ru (V.V.S.)

\* Correspondence: g.v.girichev@mail.ru; Tel.: +7-4932-35-98-74

Table S1. Disagreement factor  $R_f$  and calculated vibration amplitude  $l(F5...F10)$  versus the torsion vibration frequency of the  $Re_2F_8$  molecule.

| $\nu_{tors}$ | 20 $cm^{-1}$ | 30 $cm^{-1}$ |           | 40 $cm^{-1}$ | 50 $cm^{-1}$ |
|--------------|--------------|--------------|-----------|--------------|--------------|
| $R_f$ , %    | 5.061        | 4.832        |           | 5.145        | 5.491        |
|              | $l_{calc}^1$ | $l_{calc}$   | $l_{exp}$ | $l_{calc}$   | $l_{calc}$   |
| F5...F10, Å  | 0.432        | 0.314        | 0.315(15) | 0.260        | 0.231        |

<sup>1</sup> Calculated (using different values of the torsion force constant and frequency) and experimental vibration amplitudes of the  $Re_2F_8$  molecule.

Table S2. The calculated and experimental structural characteristics of the  $[Re_2X_8]^{2-}$  ( $X=F, Cl, Br$ ).

|                   |          | $r(Re-Re)$ , Å | $r(Re-X)$ , Å  | $\alpha(XReRe)$ , ° | $\nu(Re-Re)$ , $cm^{-1}$ | $\nu_{tors}$ , $cm^{-1}$ | $\nu(Re-X)^a$ , $cm^{-1}$ |
|-------------------|----------|----------------|----------------|---------------------|--------------------------|--------------------------|---------------------------|
| $[Re_2F_8]^{2-}$  | calc     | 2.231          | 1.977          | 104.2               | 337                      | 66                       | 485 - 579                 |
|                   | exp [15] | 2.188(3)       | 1.92 - 1.96(3) | 99.9 - 102.6(4)     | 317                      |                          | 525 - 568                 |
| $[Re_2Cl_8]^{2-}$ | calc     | 2.216          | 2.357          | 104.5               | 292                      | 44                       | 267 - 336                 |
|                   | exp [13] | 2.224(1)       | 2.330(2)       | 103.4(5)            | 274 [12]                 |                          | 361 [12]                  |
| $[Re_2Br_8]^{2-}$ | calc     | 2.225          | 2.512          | 105.2               | 287                      | 25                       | 159 - 224                 |
|                   | exp [13] | 2.226(4)       | 2.467(4)       | 104.6(4)            | 276 [12]                 |                          | 211 [12]                  |

<sup>a</sup> the range of eight stretching Re-X vibration frequencies.

Table S3. Conditions of the synchronous GED/MS experiments.

| Nozzle-to plate distances, mm                      | 338                 | 598                 |
|----------------------------------------------------|---------------------|---------------------|
| Number of recorded plates                          | 7                   | 7                   |
| Electron beam current, $\mu A$                     | 2.7                 | 0.6                 |
| Wavelength of electrons, Å                         | 0.04329(8)          | 0.04335(8)          |
| Temperature of the effusion cell, K                | 471(5)              | 471(5)              |
| Average exposure time, s                           | 180                 | 105                 |
| Residual gas pressure in diffraction chamber, Torr | $1.3 \cdot 10^{-6}$ | $3.1 \cdot 10^{-6}$ |
| s-range/ $\Delta s$ , Å <sup>-1</sup>              | 2.4-23.3/0.1        | 1.1-15.0/0.1        |
| Ionization voltage, V                              | 50                  | 50                  |

Table S4. The vibrational frequency values of the molecule  $\text{Re}_2\text{F}_8$  obtained in three variants DFT.

| Frequency,<br>$\text{cm}^{-1}$ | PBE0/qRECP-1 | B3LYP/qRECP-2 | PBE/RECP-3 |
|--------------------------------|--------------|---------------|------------|
| $\omega_1(a_{1g})$             | 749          | 710           | 704        |
| $\omega_2(e_u)$                | 711          | 687           | 677        |
| $\omega_3(a_{2u})$             | 699          | 672           | 665        |
| $\omega_4(e_g)$                | 689          | 668           | 657        |
| $\omega_5(b_{1g})$             | 670          | 642           | 638        |
| $\omega_6(b_{2u})$             | 617          | 594           | 597        |
| $\omega_7(a_{1g})$             | 370          | 345           | 338        |
| $\omega_8(b_{2g})$             | 325          | 309           | 312        |
| $\omega_9(b_{1u})$             | 312          | 296           | 304        |
| $\omega_{10}(a_{2u})$          | 272          | 271           | 265        |
| $\omega_{11}(e_g)$             | 221          | 207           | 217        |
| $\omega_{12}(a_{1g})$          | 193          | 198           | 185        |
| $\omega_{13}(e_u)$             | 213          | 197           | 207        |
| $\omega_{14}(e_g)$             | 193          | 186           | 186        |
| $\omega_{15}(b_{1g})$          | 170          | 183           | 161        |
| $\omega_{16}(b_{2u})$          | 172          | 177           | 173        |
| $\omega_{17}(e_u)$             | 131          | 147           | 125        |
| $\omega_{18}(a_{1u})$          | 40           | 10            | 43         |

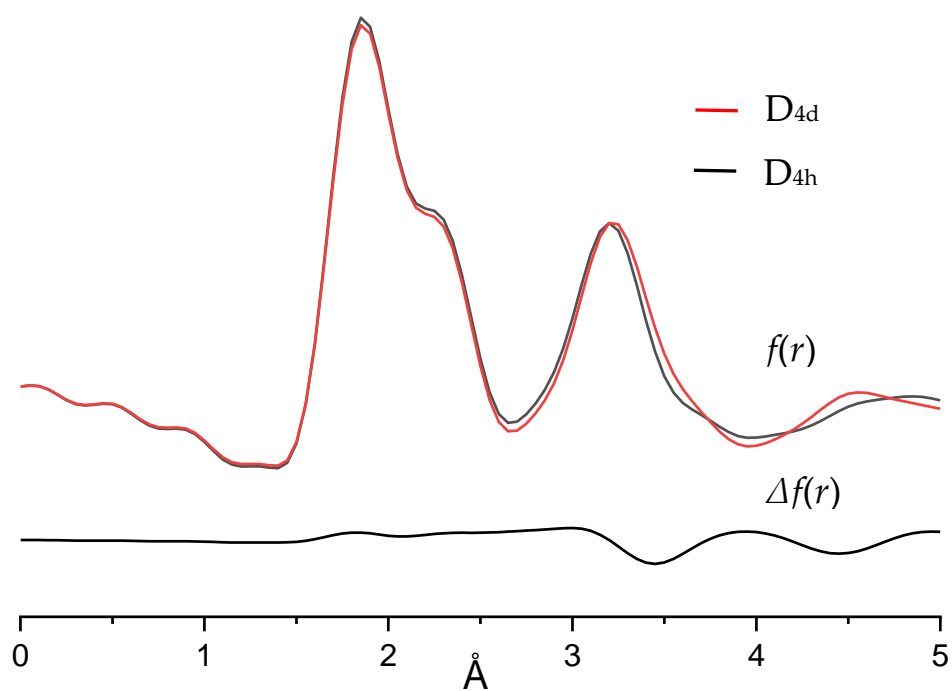

Figure S1. Theoretical functions  $f(r)$  for models  $D_{4h}$  and  $D_{4d}$  of the  $\text{ReF}_8$  molecule and difference curve  $\Delta f(r)$ .

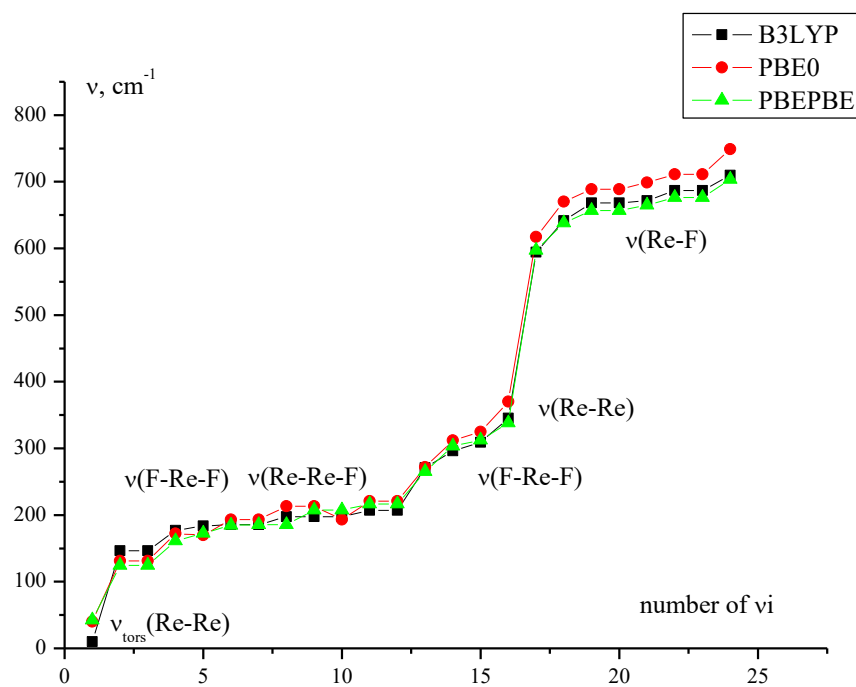

Figure S2. The values of vibrational frequencies of the molecule  $\text{Re}_2\text{F}_8$  obtained in three variants DFT.
